# Supplementary material for: Transformation optics for antennas: why limit the bandwidth with metamaterials?
Source: PubMed Central journal article supplement — Sci Rep. 2013 May 28;3:1903. doi: 10.1038/srep01903 (PMC3664901; doi:10.1038/srep01903), 2013-05-28
Supplement: srep01903-s1.pdf [file srep01903-s1.pdf]

## Supplementary Information

# Transformation Optics for Antennas: Why limit the bandwidth with Metamaterials?

Oscar Quevedo-Teruel<sup>1</sup>, Wenxuan Tang<sup>1</sup>, Rhiannon C. Mitchell-Thomas<sup>1</sup>, Amy Dyke<sup>2</sup>, Hazel Dyke<sup>2</sup>, Lianhong Zhang<sup>1</sup>, Sajad Haq<sup>2</sup> and Yang Hao<sup>1\*</sup>

<sup>1</sup>*School of Electronic Engineering and Computer Science, Queen Mary University of London, London E1 4NS, UK,*

<sup>2</sup>*Advanced Technology Centre, BAE SYSTEMS, Bristol BS34 7QW, UK.*

\**Correspondence should be addressed to Y.H. (email: yang.hao@eeecs.qmul.ac.uk).*

**The Supplementary Information includes:  
Supplementary Figures S1 – S7, and Supplementary Table S1.**

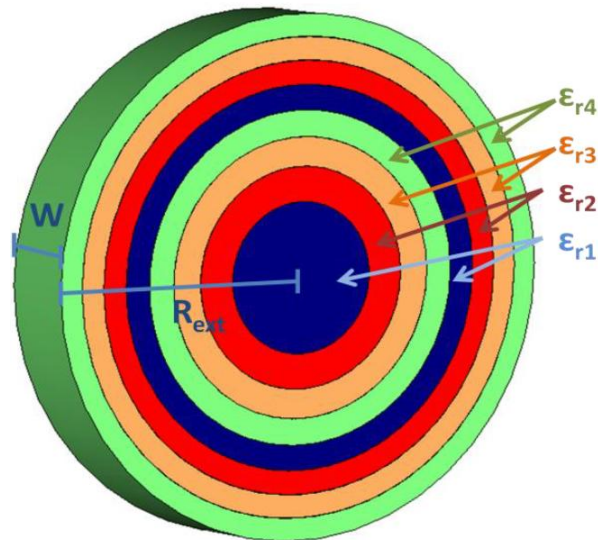

**Figure S1 | Graphical configuration of a Fresnel lens.** Dimensions were chosen for obtaining a comparable size to the transformed lens (following the guidelines in <sup>27-29</sup>) are:  $R_{\text{ext}} = 97\text{mm}$  and  $W = 30\text{mm}$ ,  $\epsilon_{r1} = 2.6$ ,  $\epsilon_{r2} = 5.6$ ,  $\epsilon_{r3} = 4.5$  and  $\epsilon_{r4} = 3.5$ .

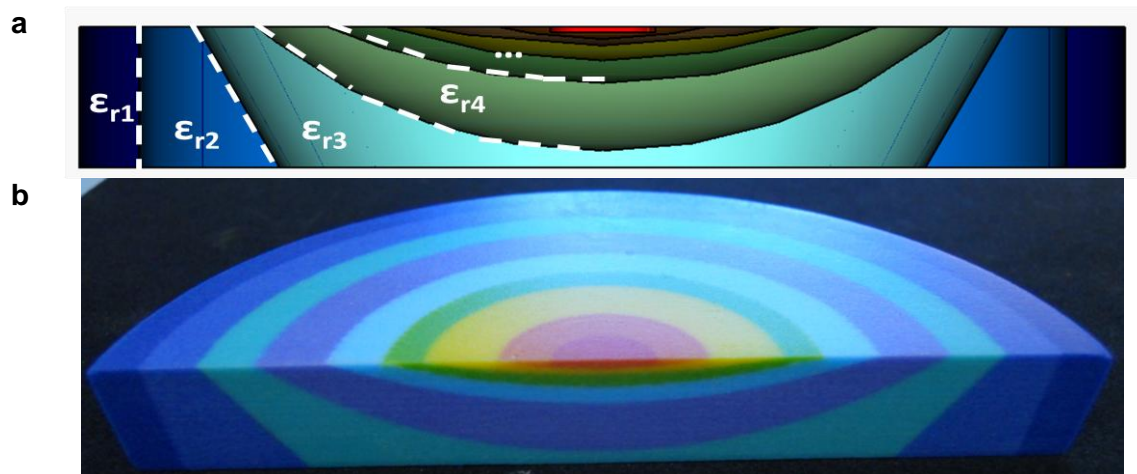

**Figure S2 | Illustration of the discretization of the dielectric constant distribution for practical implementation.** (a) Graphical illustration of the employed boundaries for different permittivity regions. (b) Photo of a section-cut of a preliminary prototype.

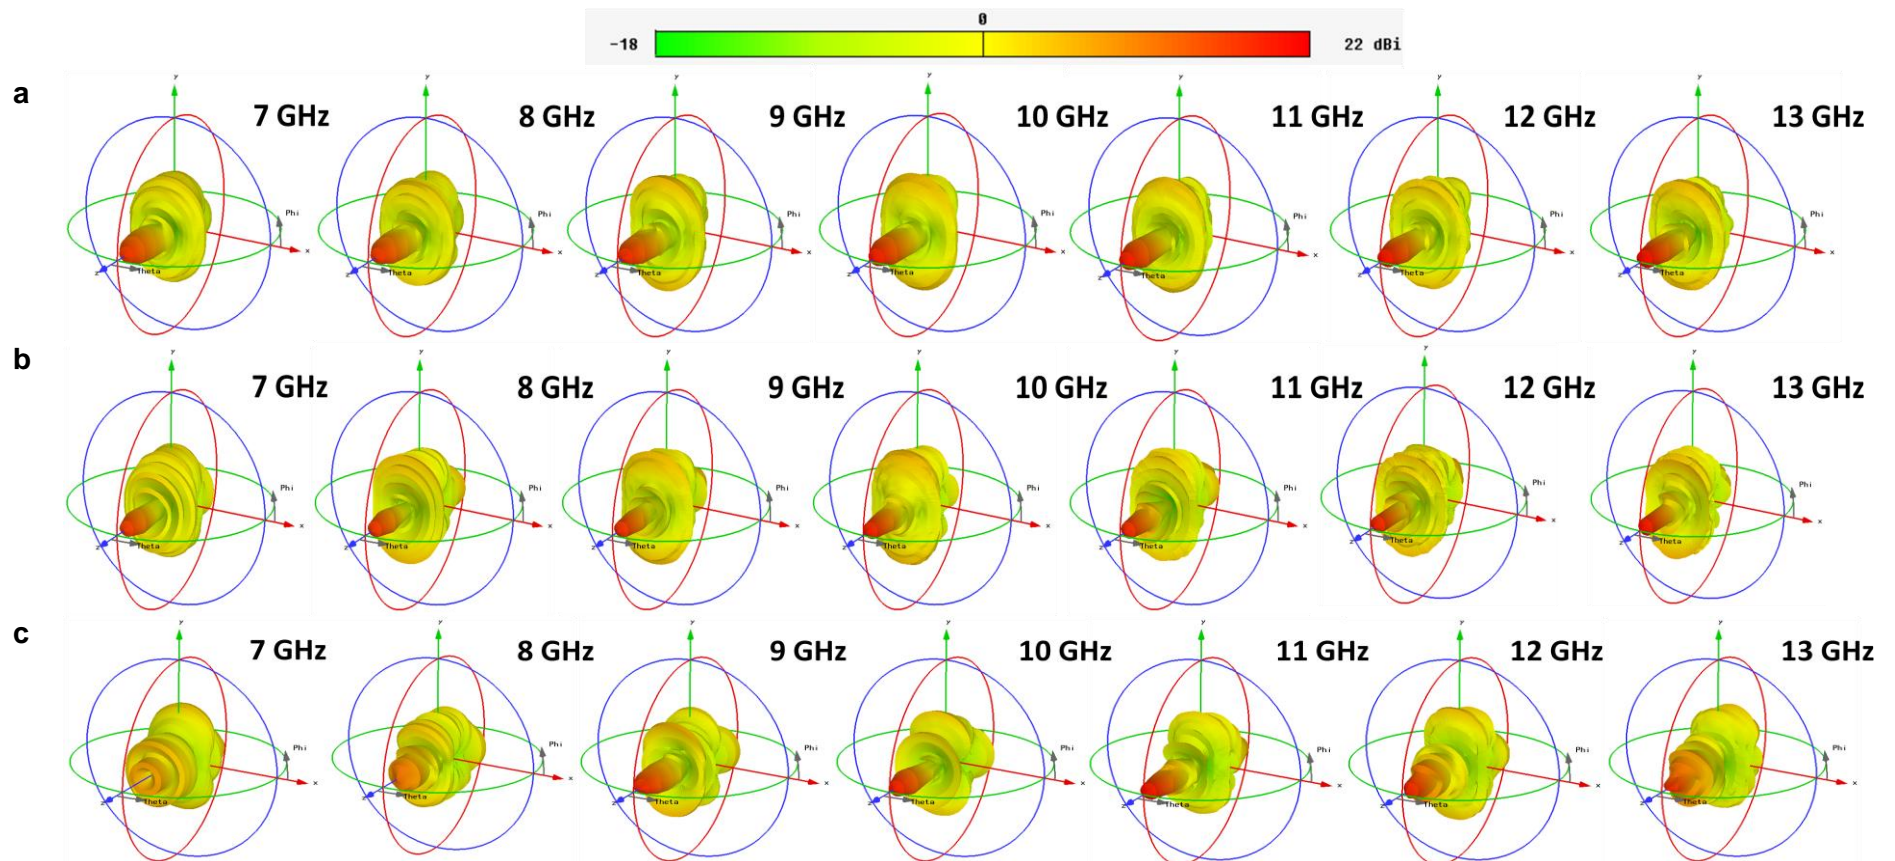

**Figure S3 | Radiation patterns (Directivity in dB) of the lenses under study when they are fed with an X-band waveguide at their focal point. (a) Hyperbolic lens. (b) Electromagnetic transformed lens. (c) Fresnel lens as defined in Figure S1.**

|                 | Target $\epsilon_r$ | Manufactured $\epsilon_r$ |
|-----------------|---------------------|---------------------------|
| $\epsilon_{r1}$ | 3                   | 2.9                       |
| $\epsilon_{r2}$ | 4.2                 | 4.2                       |
| $\epsilon_{r3}$ | 5.4                 | 5.6                       |
| $\epsilon_{r4}$ | 6.6                 | 6.9                       |
| $\epsilon_{r5}$ | 7.8                 | 8.6                       |
| $\epsilon_{r6}$ | 9.0                 | 9.7                       |
| $\epsilon_{r7}$ | 10.2                | 11.8                      |
| $\epsilon_{r8}$ | 11.4                | 13.2                      |
| $\epsilon_{r9}$ | 12.6                | 14.5                      |

**Table S1 | Target and manufactured dielectric constants.** In the manufacturing process of the materials, some deviations from the original material requirement were observed.

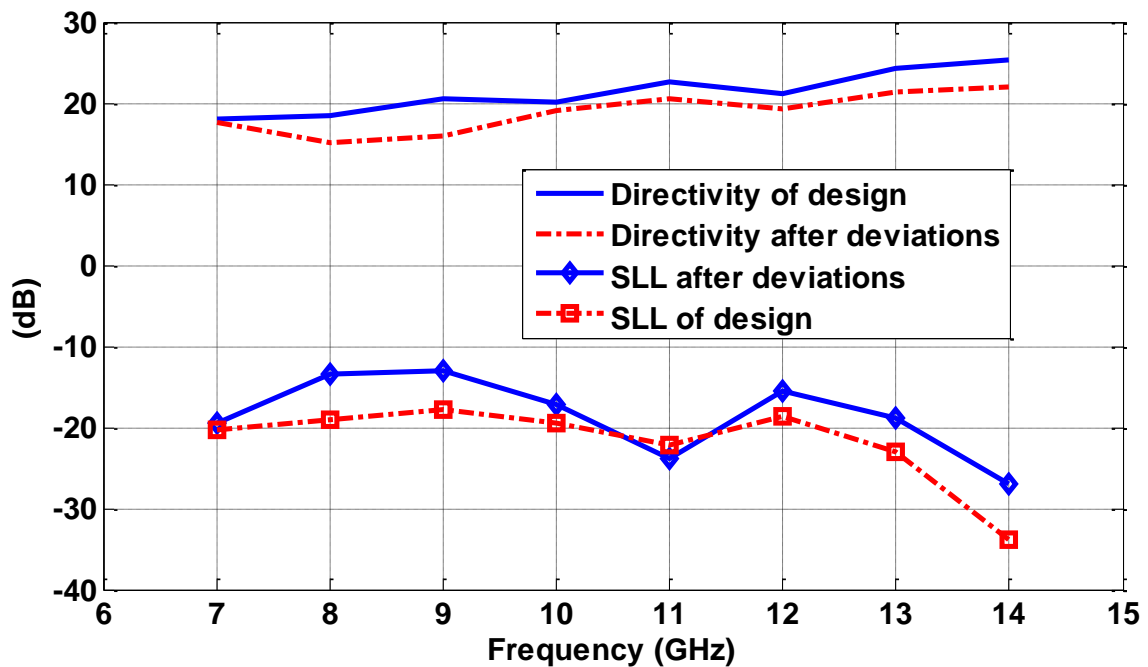

**Figure S4 | Comparison (with simulated directivity and Side Lobe Level) between the initial design with the desired dielectric properties and the manufactured ones (material deviations) as indicated in Table S1.** In order to obtain these results, a pyramidal X-band horn was employed as the transmitter positioned at the focal point of the lens.

a

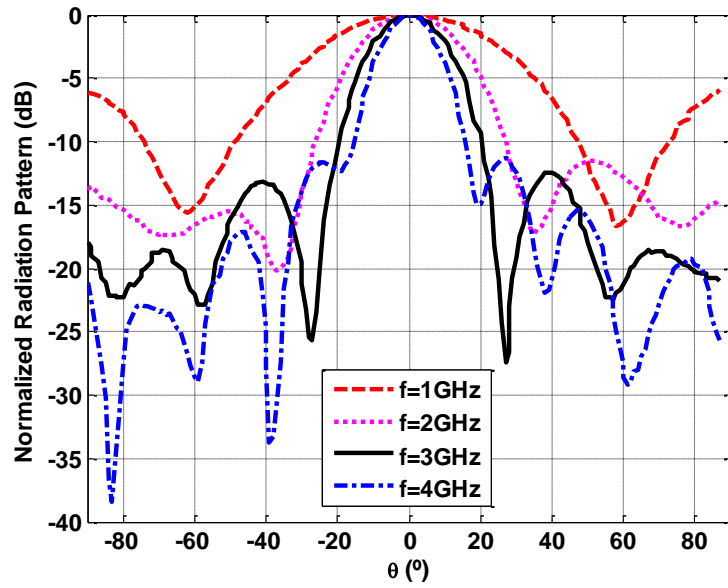

b

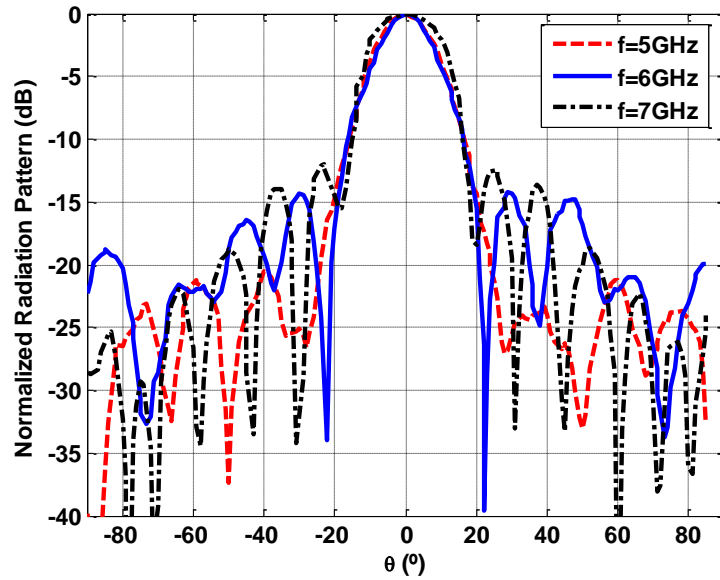

c

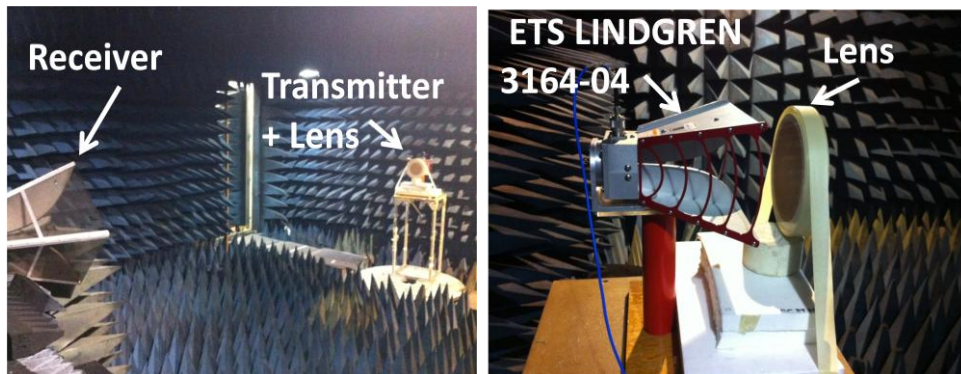

Figure S5 | Measured direct ray radiation pattern in an anechoic chamber. (a) 1-4GHz. (b) 5-7GHz. (c) Configuration in the anechoic chamber.

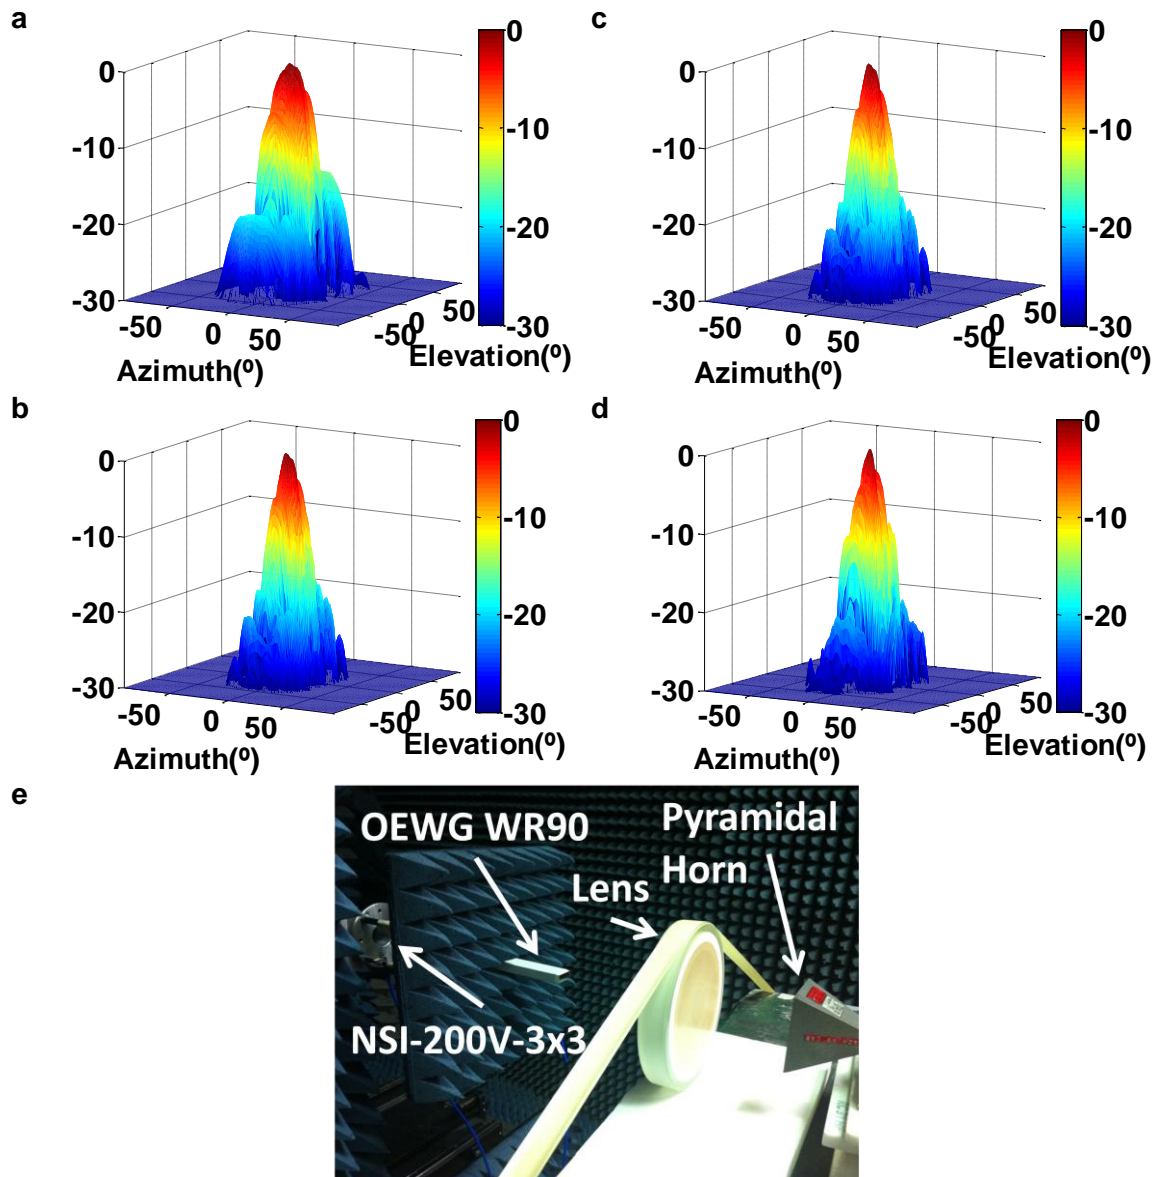

**Figure S6 | Measured 2D normalized far-field distribution.** Frequencies not shown in the paper for the sake of brevity. (a) 8 GHz. (b) 9 GHz. (c) 11 GHz. (d) 13 GHz. (e) Configuration for the measurements with the near field scanner.

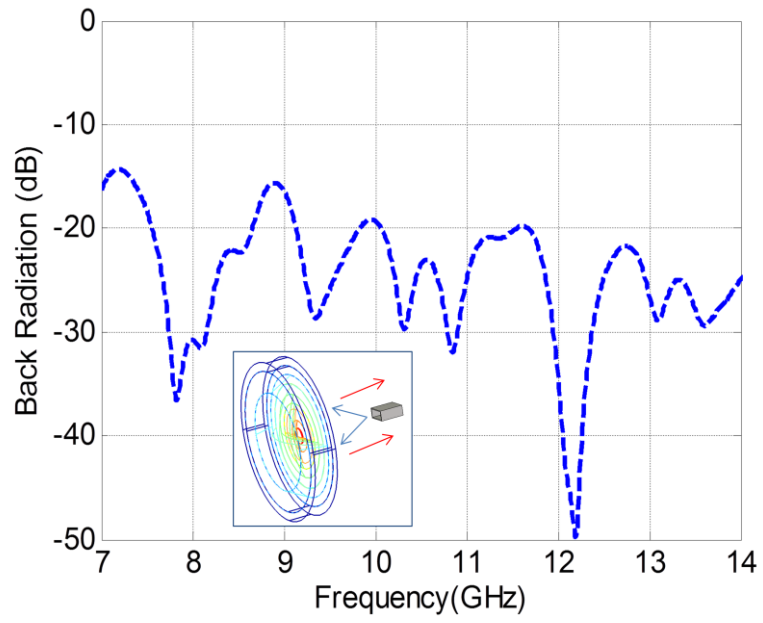

**Figure S7 | Simulated back radiation.** Reflected fields from the lens when it was fed with an X-band waveguide at the focal point (as indicated in the inset).
